# Supplementary material
Source: PubMed Central journal article supplement (PMC11114933)
Supplement: 18_2010_541_MOESM3_ESM.pdf [file 18_2010_541_MOESM3_ESM.pdf]

Supplementary figure S3

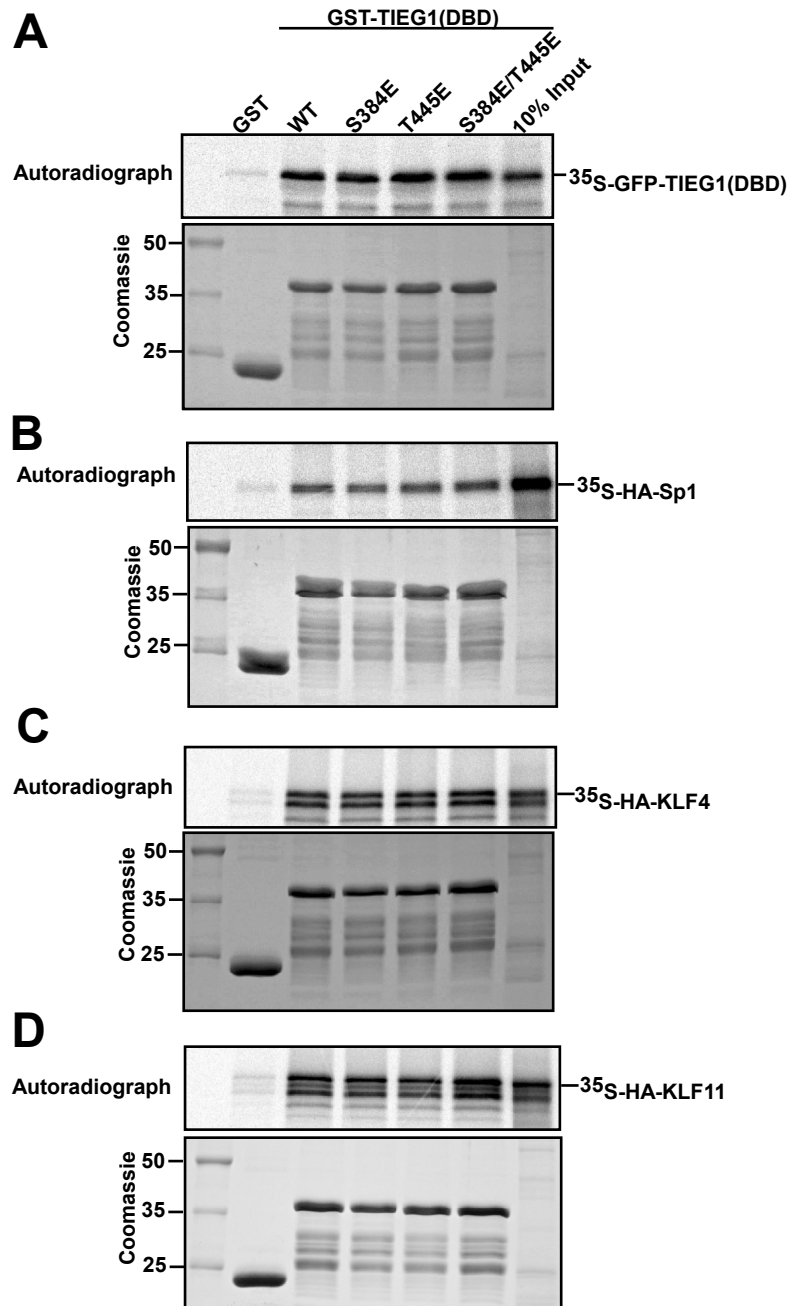

**Supplementary figure S3:** Phospho-mimicking mutations do not affect TIEG1's ability to homo and heterodimerize. GST pull-down assays were carried out using bacterially expressed GST, or the indicated GST-TIEG1(DBD) mutants, and *in vitro* translated either GFP-TIEG1(DBD) (**A**), full-length HA-Sp1 (**B**), full-length HA-KLF4 (**C**), or full-length HA-KLF11 (**D**). Autoradiographs are presented in the upper panels whereas Coomassie brilliant blue stained SDS-polyacrylamide gels are shown in the lower panels.
